# Supplementary material
Source: publisher figshare collection journal article supplement (https://acs.figshare.com/ndownloader/files/28457082)
Supplement: Supplementary file 1 [file 28457082]

## Supporting Information

### Experimental and Theoretical Insights into the Active Sites on WO<sub>x</sub>/Pt(111) Surfaces for Dehydrogenation and Dehydration Reactions

Zhexi Lin,<sup>1,4,#</sup> Shizhong Liu,<sup>2,4,#</sup> Steven R. Denny,<sup>1,4</sup> William N. Porter,<sup>1</sup> Stavros Caratzoulas,<sup>4</sup> J. Anibal Boscoboinik,<sup>3,4</sup> Dionisios G. Vlachos,<sup>\*2,4</sup> Jingguang G. Chen<sup>\*1,4</sup>

1. Department of Chemical Engineering, Columbia University, New York, NY 10027, United States
2. Department of Chemical and Biomolecular Engineering, University of Delaware, Newark, DE 19716, United States
3. Center for Functional Nanomaterials, Brookhaven National Laboratory, Upton, NY 11973, United States
4. Catalysis Center for Energy Innovation, University of Delaware, United States

\* Corresponding authors: [vlachos@udel.edu](mailto:vlachos@udel.edu), [jgchen@columbia.edu](mailto:jgchen@columbia.edu).

# These authors contributed equally to this work.

## 1. Method for Estimating Tungsten Coverage on Pt(111)

Shown below is the method we used to estimate the W coverages on Pt(111). The W coverages estimated from the peak areas of CO TPD experiments were correlated to the measured AES peak-to-peak ratios of W (38 eV) and Pt (168 eV). It should be pointed out that the accurate sensitivity factor for the W (38 eV) peak is difficult to obtain, and that the Pt substrate is screened by the WO<sub>x</sub> overlayer. Therefore, the peak-to-peak ratios instead of the atomic ratios were used to correlate with the peak areas from CO TPD experiments. The data was fitted by a linear equation, which was used in later experiments to estimate W coverages from AES measurements.

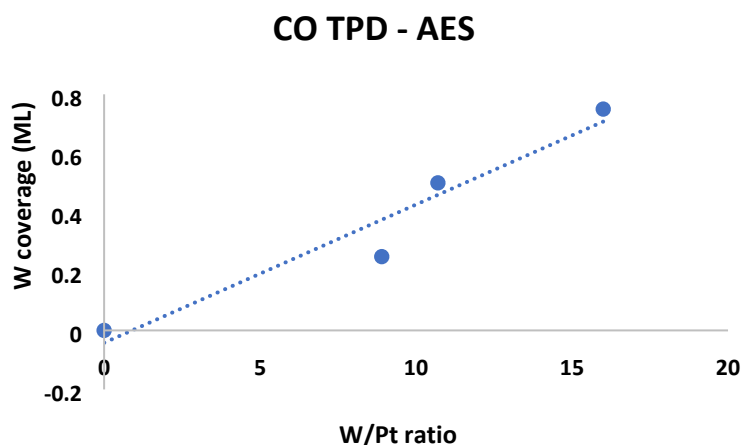

**Figure S1.** Correlation of W(38 eV)/Pt(168 eV) peak-to-peak ratios with W coverages estimated from the peak areas of CO TPD experiments.

**Table S1.** W(38 eV)/Pt(168 eV) AES ratios at WO<sub>x</sub> coverages estimated by CO TPD experiments.

| WO <sub>x</sub> coverage (ML) | W (38 eV)/Pt (168 eV) ratio |
|-------------------------------|-----------------------------|
| 0.00                          | 0.00                        |
| 0.25                          | 8.90                        |
| 0.50                          | 10.70                       |
| 0.75                          | 16.00                       |

## 2. IPA Desorption of Surfaces Modified by Different Coverages of Tungsten

Shown in Figure S2 is the desorption spectra of IPA (45 amu). Two types of IPA desorption peaks were observed. For surfaces modified with  $\text{WO}_x$ , the peaks centered at 161 K were contributed from weakly bonded IPA, while the peaks centered at 206 K were contributed from strongly bonded IPA. For Pt(111), the strongly bonded peak appeared at 223 K. The fraction of IPA reacted is shown in Table S2. The quantification results were based on the desorption peaks of strongly bonded IPA. Clearly, on surfaces with 0.6 ML W or less, most of the IPA (greater than 85 %) desorbed. As the W coverage was increased, more IPA underwent reactions instead of desorbing. On above 1 ML W/Pt(111), only 21% of IPA desorbed, while 79% reacted.

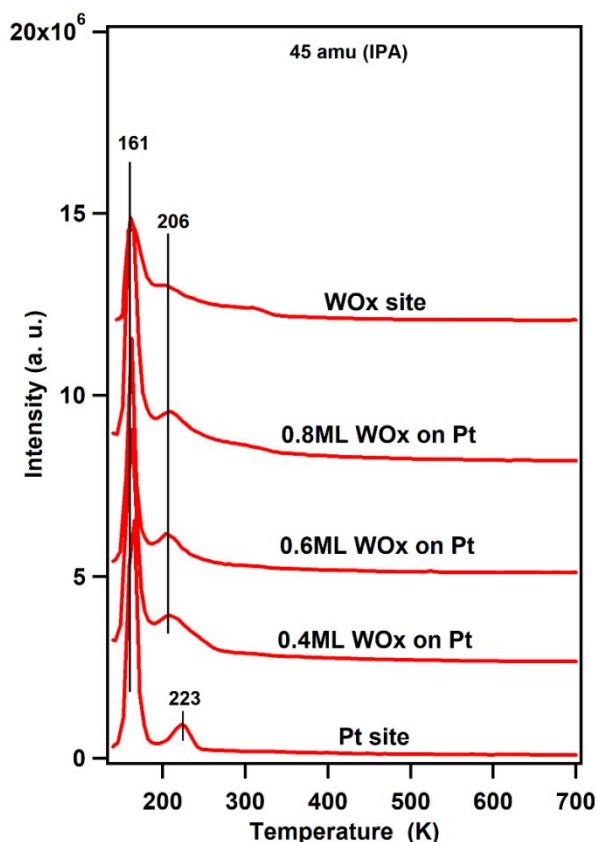

**Figure S2.** Desorption spectra of IPA (45 amu) after an exposure of 5 L IPA on Pt(111) surfaces modified by different coverages of  $\text{WO}_x$ .

**Table S2.** Activities of Different Reaction Pathways and IPA Desorption (Molecules per Metal Atom) on Corresponding Surfaces with the Percentage of IPA Desorbed Shown in Parenthesis

| WO <sub>x</sub> coverage | Dehydrogenation | Dehydration | IPA desorption | % IPA reacted |
|--------------------------|-----------------|-------------|----------------|---------------|
| 0 ML                     | 0.011           | 0.000       | 0.208 (95%)    | 5%            |
| 0.4 ML                   | 0.006           | 0.002       | 0.048 (86%)    | 14%           |
| 0.6 ML                   | 0.000           | 0.002       | 0.023 (93%)    | 7%            |
| 0.8 ML                   | 0.000           | 0.009       | 0.012 (59%)    | 41%           |
| Above 1 ML               | 0.000           | 0.011       | 0.003 (21%)    | 79%           |

### 3. Additional TPD Figures after Exposing the Corresponding Surfaces to IPA

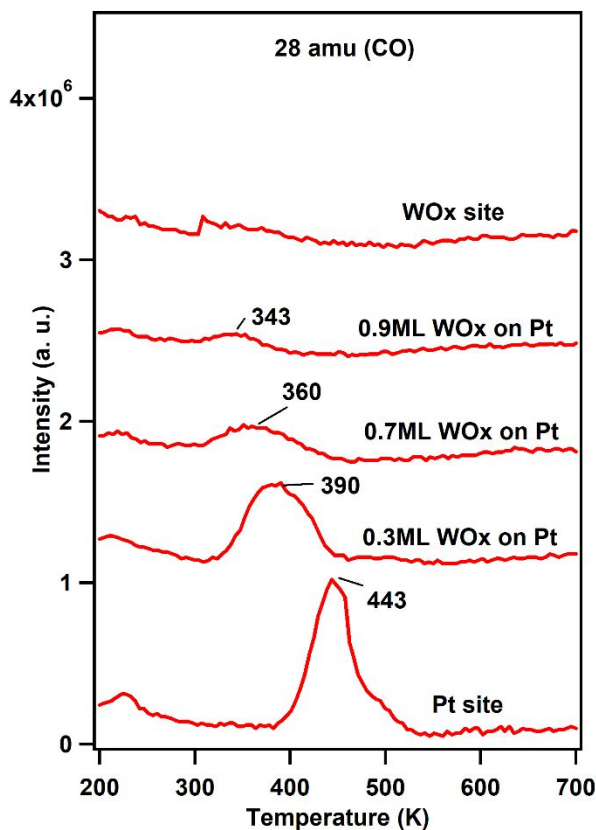

**Figure S3.** Desorption spectra of CO (28 amu) from Pt(111) surfaces modified by different coverages of WO<sub>x</sub> after an exposure to 5L IPA.

#### 4. W/Pt, O/Pt, O/W AES Peak-to-Peak Ratios as a Function of WO<sub>x</sub> Coverage

**Table S3.** W/Pt, O/Pt, O/W AES Peak-to-Peak Ratios as a Function of WO<sub>x</sub> Coverage

| WO <sub>x</sub> coverage | W/Pt | O/Pt | O/W  |
|--------------------------|------|------|------|
| 0ML                      | 0.00 | 0.00 | N/A  |
| 0.4ML                    | 10.5 | 6.00 | 0.57 |
| 0.6ML                    | 13.3 | 10.0 | 0.75 |
| 0.8ML                    | 17.5 | 10.8 | 0.62 |
| Above ML                 | 28.6 | 17.1 | 0.60 |

#### 5. Quantification Results of CO TPD and IRRA Spectra of CO Adsorption on Pt(111) and As-synthesized WO<sub>x</sub>/Pt(111) Surfaces

**Table S4.** CO Activity (Molecules per Metal Atom) as a Function of WO<sub>x</sub> Coverage

| WO <sub>x</sub> coverage | CO activity |
|--------------------------|-------------|
| 0.00 ML                  | 0.445       |
| 0.75 ML                  | 0.334       |
| 0.50 ML                  | 0.220       |
| 0.00 ML                  | 0.000       |

Show in Figure S4 below is the CO IRRA spectra on the Pt(111) and as-synthesized WO<sub>x</sub>/Pt(111) surfaces. The CO vibrational frequency on WO<sub>x</sub>/Pt(111) was 2102 cm<sup>-1</sup>, as compared to 2083 cm<sup>-1</sup> on Pt(111). This indicated that CO bonded to WO<sub>x</sub>/Pt(111) less strongly than Pt(111), consistent with the CO TPD data shown in the Manuscript (Figure 1). This also suggested that WO<sub>x</sub> modified Pt(111) electronically.

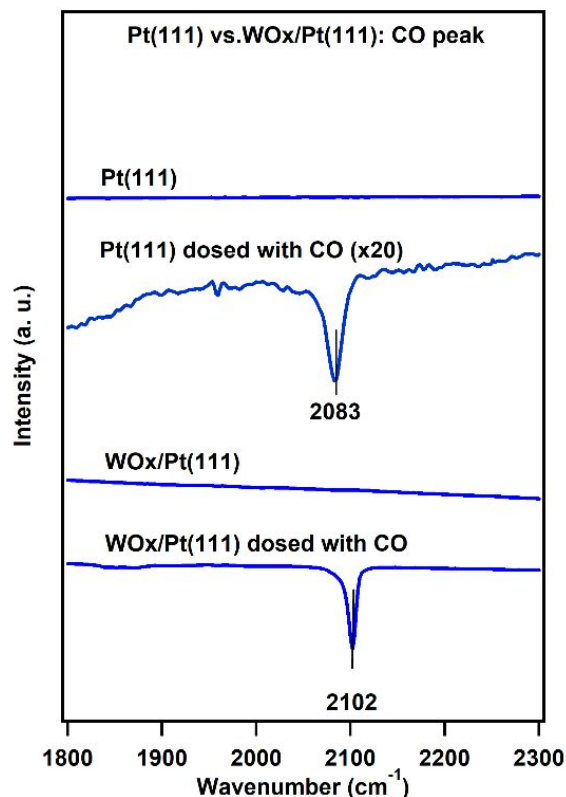

**Figure S4.** IRRA spectra of CO adsorption on Pt(111) and as-synthesized WO<sub>x</sub>/Pt(111).

## 6. Quantification Results for H<sub>2</sub> and H<sub>2</sub>O Desorption after Exposing the Corresponding Surfaces to IPA

The quantification results are shown in Table S5. On surfaces with less than 0.6 ML WO<sub>x</sub>, H<sub>2</sub> that desorbed came from both the H<sub>2</sub> produced by the dehydrogenation reaction, as well as the background H<sub>2</sub> adsorbed on the surface. When there were more than 0.6 ML WO<sub>x</sub> on the surface, H<sub>2</sub> could not adsorb. In contrast, H<sub>2</sub>O desorption followed the same trend as that of the dehydration pathway (propylene desorption), because H<sub>2</sub>O was produced by the dehydration reaction.

**Table S5.** Activities (Molecules per Metal Atom) of Dehydrogenation, Dehydration, H<sub>2</sub> Desorption, and H<sub>2</sub>O Desorption

| WO <sub>x</sub><br>coverage | Dehydrogenation | Dehydration | H <sub>2</sub><br>Desorption | H <sub>2</sub> O<br>Desorption |
|-----------------------------|-----------------|-------------|------------------------------|--------------------------------|
| 0 ML                        | 0.011           | 0.000       | 0.106                        | 0.000                          |
| 0.4 ML                      | 0.006           | 0.002       | 0.023                        | 0.002                          |
| 0.6 ML                      | 0.000           | 0.002       | 0.006                        | 0.002                          |
| 0.8 ML                      | 0.000           | 0.009       | 0.000                        | 0.007                          |
| Above 1 ML                  | 0.000           | 0.011       | 0.000                        | 0.011                          |
